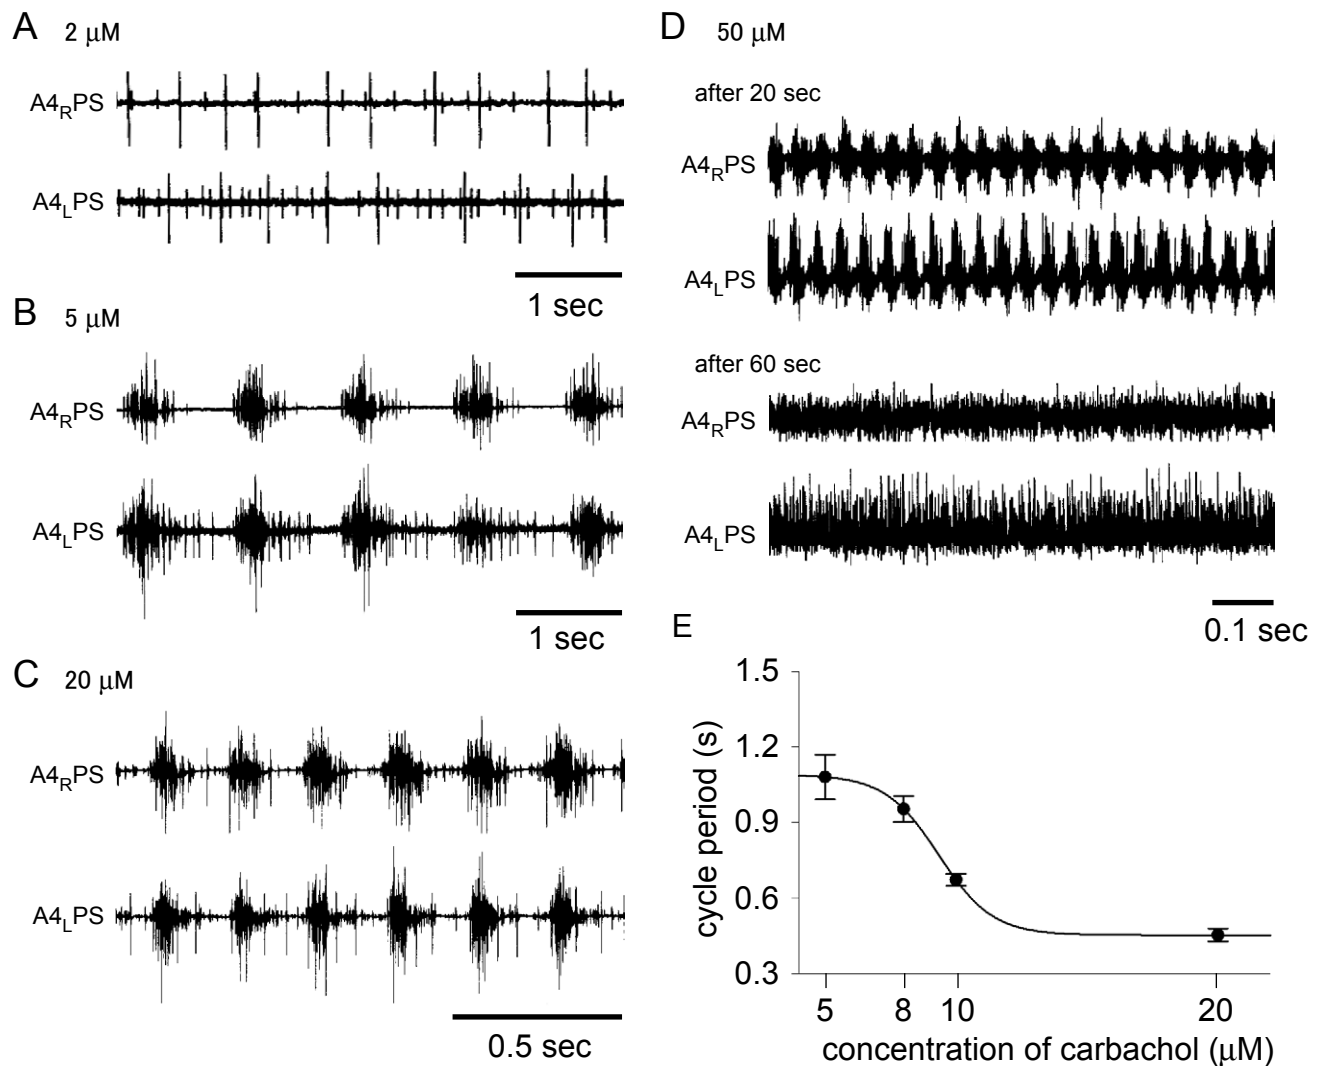

**Fig. S1. Dose-dependent effect of carbachol upon rhythmic beating activity of the swimmeret motor neurones.** (A) Application of 2  $\mu\text{M}$  carbachol elicited spikes of right (upper trace) and left (lower trace) power-stroke (PS) motor neurones in the 4th abdominal ganglion from silent preparation with no rhythmic beating activity. (B) Application of 5  $\mu\text{M}$  carbachol elicited synchronous rhythmic bursts of spikes in the motor neurones on both sides. (C) Burst frequency of both motor neurones was increased when 20  $\mu\text{M}$  carbachol was applied. (D) Application of 50  $\mu\text{M}$  carbachol elicited high frequency of rhythmic bursts of motor neurone spikes first (upper traces: after 20 s). Then, spike trains of the motor neurones showed continuous spiking activity without any rhythms (lower traces: after 60 s). (E) Semilogarithmic dose-response relationship between the concentration of applied carbachol and the cycle period of the power-stroke swimmeret motor neurones (mean  $\pm$  s.e.m.). The cycle period was defined as a time from the first spike of the burst to the first spike of next burst.
